# Supplementary material
Source: PubMed Central journal article supplement (PMC3835726)

**CONSERVATION of APOLIPOPROTEIN A-I's CENTRAL DOMAIN STRUCTURAL  
ELEMENTS UPON LIPID ASSOCIATION ON DIFFERENT HDL SUBCLASSES**

**Michael N. Oda, Madhu S. Budamagunta, Ethan G. Geier, Sajiv H. Chandradas, Baohai  
Shao, Jay W. Heinecke, John C. Voss, and Giorgio Cavigliolo**

**SUPPLEMENTAL FIGURE LEGENDS**

**Fig. S1.** Human wild-type apoA-I sequence. Helix distribution derived by sequence analysis (1, 2). The 21 residues under investigation in this study are highlighted in yellow, Pro are marked in red.

**Fig. S2.** Representative fluorescence emission spectra of a single-Trp apoA-I variant (L144W) in the lipid-free and lipid-associated (7.8 and 9.6 nm rHDL) states.

**Fig. S3.** Schiffer-Edmunson helical wheel projections of  $\alpha$ 18/5 (top) and  $\alpha$ 11/3 (bottom) pitch (3) of regions 111-128, 133-150, and 157-174. Residues were color coded according to side chain polarities: dark grey for hydrophobic, white for polar and uncharged, and pink for charged residues. The orientation of the amphipathic wheels was solely based on clustering of hydrophobic residue on a sector of the wheel. The apolar and polar solvation space were color-coded yellow and blue, respectively.

## SUPPLEMENTAL REFERENCES

1. Andrews, A. L., Atkinson, D., Barratt, M. D., Finer, E. G., Hauser, H., Henry, R., Leslie, R. B., Owens, N. L., Phillips, M. C., and Robertson, R. N. (1976) Interaction of apoprotein from porcine high-density lipoprotein with dimyristoyl lecithin. 2. Nature of lipid-protein interaction, *Eur J Biochem* 64, 549-563.
2. Segrest, J. P., Jones, M. K., De Loof, H., Brouillette, C. G., Venkatachalapathi, Y. V., and Anantharamaiah, G. M. (1992) The amphipathic helix in the exchangeable apolipoproteins: a review of secondary structure and function, *J Lipid Res* 33, 141-166.
3. Segrest, J. P., Jones, M. K., Mishra, V. K., and Anantharamaiah, G. M. (2002) Experimental and computational studies of the interactions of amphipathic peptides with lipid surfaces, in *Peptide-Lipid Interactions*, pp 397-435, Academic Press.

Figure S1

|          |     |                                                 |     |
|----------|-----|-------------------------------------------------|-----|
|          | 1   | DDPPQSP                                         | 7   |
|          | 8   | WDRVKDLATVYVDVLKDSGRDYVSQF                      | 33  |
|          | 34  | EGSALGKQLN                                      | 43  |
| Helix 1  | 44  | LKLLDNWDSVTSTFSKLREQLG                          | 65  |
| Helix 2  | 66  | PVTQEFWDNLEKETEGLRQEMS                          | 87  |
| Helix 3  | 88  | KDLEEVKAKVQ                                     | 98  |
| Helix 4  | 99  | PYLDDFQKKWQEEMELYRQK <b>VE</b>                  | 120 |
| Helix 5  | 121 | <b>PLRA</b> ELQEGARQ <b>KL</b> HELQ <b>EKLS</b> | 142 |
| Helix 6  | 143 | <b>PLGE</b> EMRDRARAHVDALR <b>THLA</b>          | 164 |
| Helix 7  | 165 | <b>PYSDEL</b> RQRLAARLEALKENGG                  | 186 |
| Helix 8  | 187 | ARLAEYHAKATEHLSTLSEKAK                          | 208 |
| Helix 9  | 209 | PALEDLRQGLL                                     | 219 |
| Helix 10 | 220 | PVLESFKVSFLSALEEYTKKLN                          | 241 |
|          | 242 | TQ                                              | 243 |

Figure S2

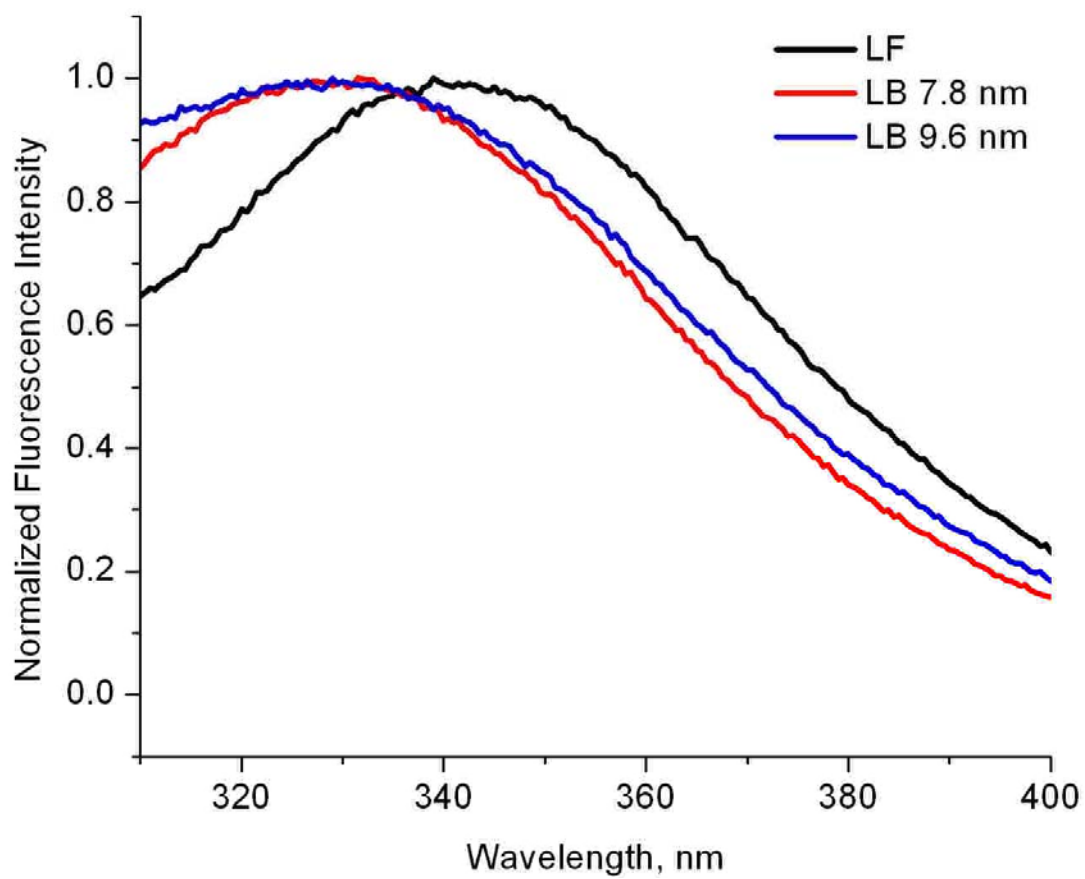

Figure S3

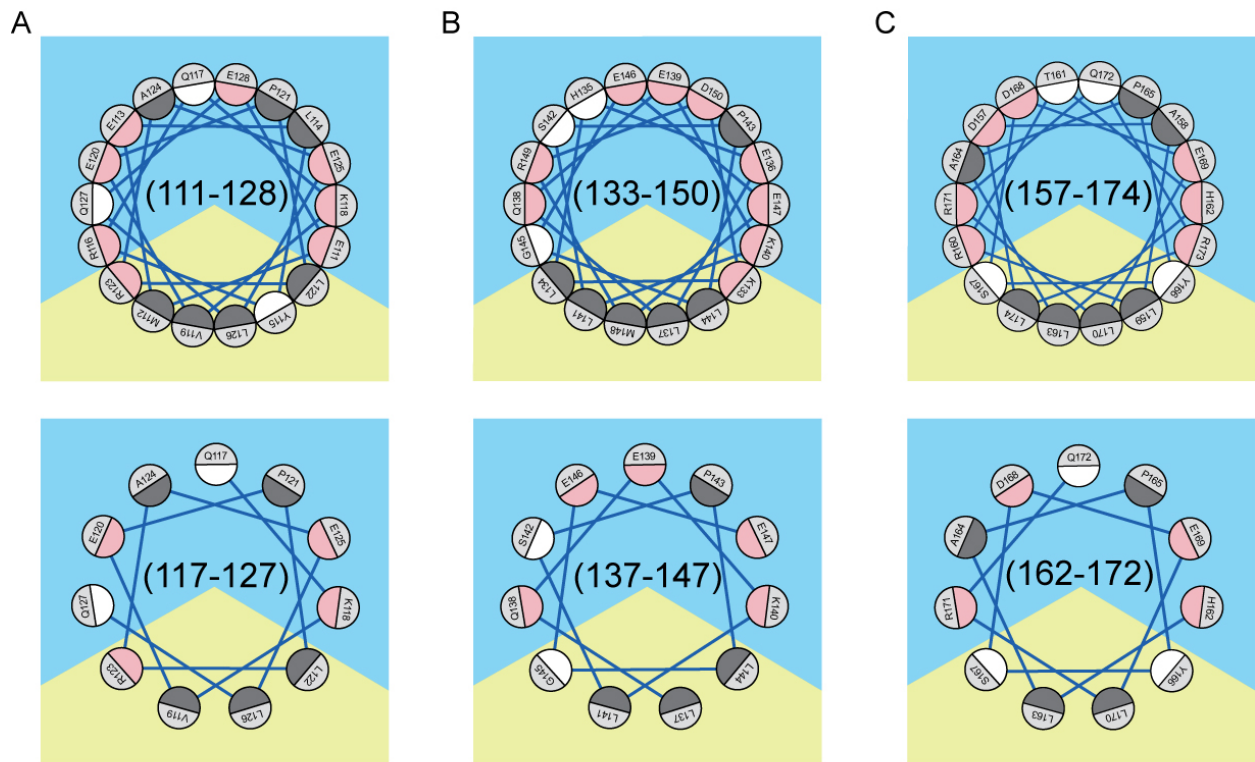

Supplement: NIHMS525620-supplement-1_si_001.pdf [file NIHMS525620-supplement-1_si_001.pdf]
